# Supplementary material for: Novel long non-protein coding RNAs involved in Arabidopsis differentiation and stress responses
Source: HighWire-hosted journal article supplement (doi:10.1101/gr.080275.108), 2008-11-07
Supplement: SupFig3.pdf [file SupFig3.pdf]

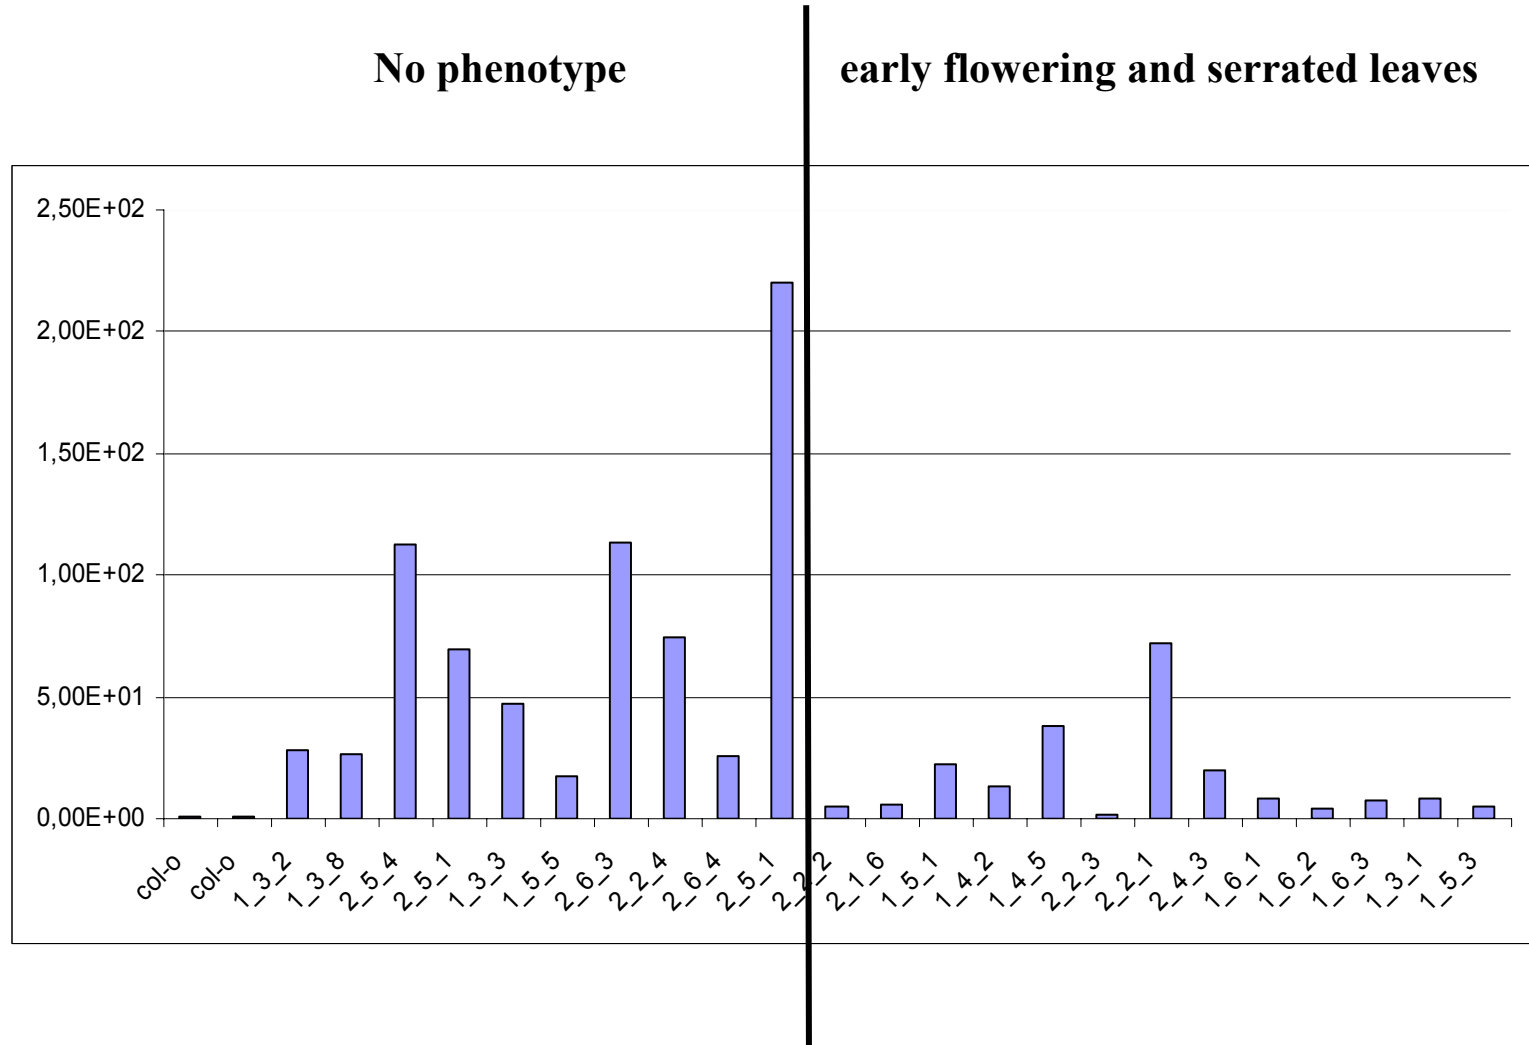

**Supplemental Fig. 3.** Expression levels of *npc48* in 24 different T1 OEnpc48 transgenic lines and 2 Col 0 vector control lines used for normalisation. Fold-induction of *npc48* ranges from 5 (line 2-2-3) to 215 (2-5-1) as normalised to Col O controls (left). Black line separates plants with or without phenotype
